# Supplementary material for: Key-Marker Volatile Compounds in Aromatic Rice (Oryza sativa) Grains: An HS-SPME Extraction Method Combined with GC×GC-TOFMS
Source: PubMed Central journal article supplement (PMC6891657; doi:10.3390/molecules24224180), 2019-11-18
Supplement: molecules-24-04180-s001.pdf [file molecules-24-04180-s001.pdf]

## Supplementary Materials

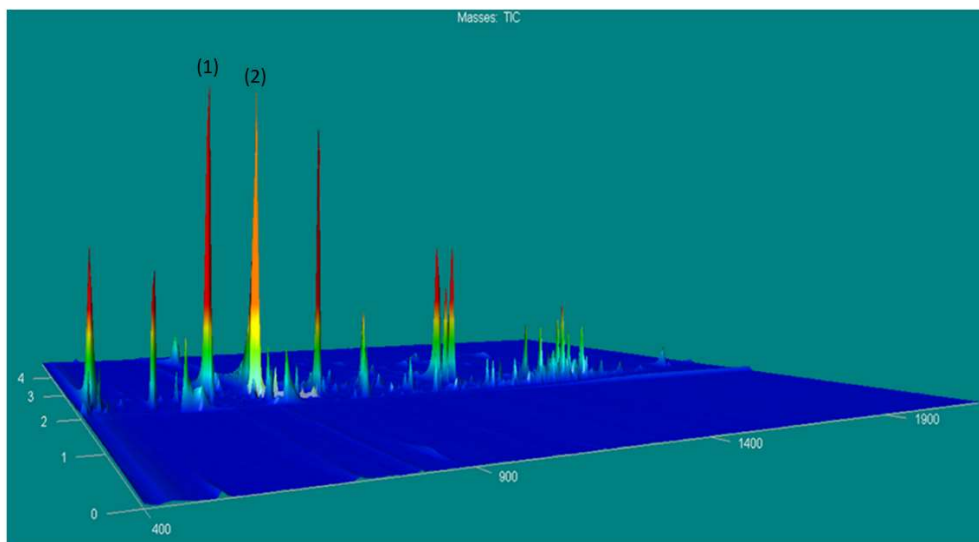

**Figure S1.** 2-acetyl-1-pyrroline (1) and internal standard 2,4,6-trimethylpyridine (2) in Pandan Leaf.

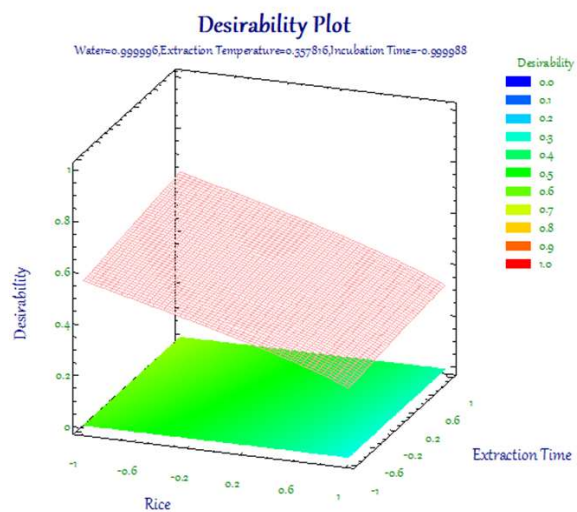

**Figure S2.** Response surface plots showing the effects of variables ( $x_1$ , sample amount;  $x_2$ , adsorption time) on the extraction yield.

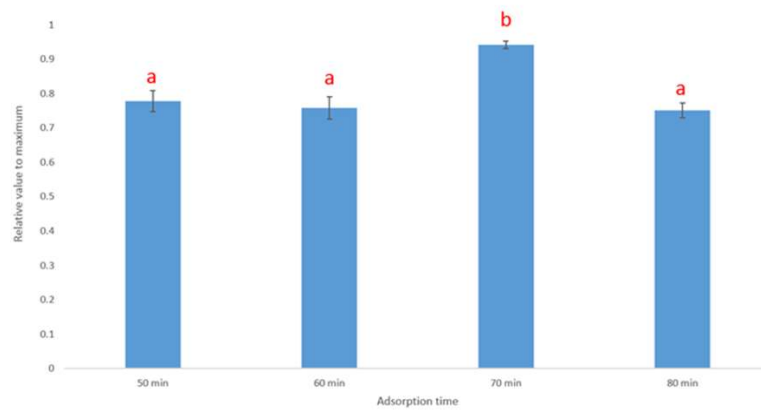

**Figure S3.** Relative amount of extracted compounds in different adsorption times.
